# Supplementary material for: Learning gene networks underlying clinical phenotypes using SNP perturbation
Source: PubMed Central journal article supplement (PMC7584257; doi:10.1371/journal.pcbi.1007940), 2020-10-23

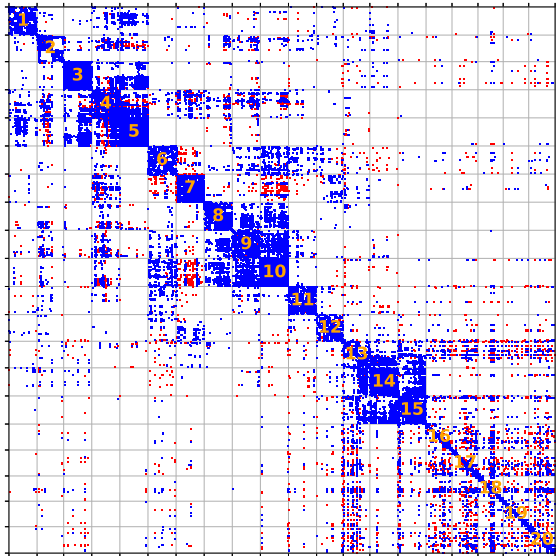

Supplement: pcbi.1007940.s004.pdf [file pcbi.1007940.s004.pdf]
