# Supplementary material for: Learning gene networks underlying clinical phenotypes using SNP perturbation
Source: PubMed Central journal article supplement (PMC7584257; doi:10.1371/journal.pcbi.1007940), 2020-10-23
Supplement: pcbi.1007940.s011.pdf [file pcbi.1007940.s011.pdf]

| Module                | Size | GO terms in biological processes                 | <i>p</i> -value        | Overlap <sup>†</sup> |
|-----------------------|------|--------------------------------------------------|------------------------|----------------------|
| 1                     | 314  | Cellular macromolecule metabolic process         | $2.94 \times 10^{-12}$ | 159 / 7006           |
| 2                     | 297  | Cellular nitrogen compound metabolic process     | $1.64 \times 10^{-4}$  | 112 / 5164           |
| 3                     | 314  | Nucleobase-containing compound metabolic process | $5.62 \times 10^{-13}$ | 123 / 4538           |
| 4                     | 314  | Organelle organization                           | $2.02 \times 10^{-4}$  | 79 / 3167            |
| 5                     | 314  | Nucleobase-containing compound metabolic process | $4.58 \times 10^{-4}$  | 106 / 4538           |
| 6                     | 314  | Unclassified                                     | NA                     | NA                   |
| 7                     | 314  | Cellular localization                            | $1.80 \times 10^{-4}$  | 60 / 2287            |
| 8                     | 314  | Cellular metabolic process                       | $1.73 \times 10^{-4}$  | 178 / 9003           |
| 9                     | 314  | Cellular metabolic process                       | $8.39 \times 10^{-6}$  | 185 / 9003           |
| 10                    | 314  | Macromolecule metabolic process                  | $8.73 \times 10^{-5}$  | 159 / 7749           |
| 11                    | 314  | Heterocycle metabolic process                    | $7.63 \times 10^{-3}$  | 103 / 4715           |
| 12                    | 298  | Translation                                      | $1.65 \times 10^{-9}$  | 27 / 383             |
| <b>13<sup>‡</sup></b> | 297  | Immune system process                            | $3.66 \times 10^{-12}$ | 83 / 2552            |
|                       |      | Response to stimulus                             | $1.70 \times 10^{-9}$  | 162 / 8009           |
|                       |      | Response to stress                               | $8.43 \times 10^{-9}$  | 90 / 3333            |
| <b>14<sup>‡</sup></b> | 314  | Immune response                                  | $3.96 \times 10^{-38}$ | 106 / 1673           |
|                       |      | Leukocyte activation involved in immune response | $9.04 \times 10^{-31}$ | 62 / 607             |
|                       |      | Granulocyte activation                           | $1.24 \times 10^{-26}$ | 53 / 495             |
| <b>15<sup>‡</sup></b> | 313  | Cell activation in immune response               | $4.95 \times 10^{-32}$ | 65 / 611             |
|                       |      | Myeloid leukocyte activation                     | $5.28 \times 10^{-32}$ | 63 / 566             |
|                       |      | Immune system process                            | $1.01 \times 10^{-31}$ | 124 / 2552           |
| 16                    | 290  | Cellular process                                 | $3.73 \times 10^{-3}$  | 132 / 15013          |
| 17                    | 290  | Regulation of macromolecule metabolic process    | $1.58 \times 10^{-3}$  | 74 / 6142            |
| 18                    | 282  | Organonitrogen compound metabolic process        | $1.97 \times 10^{-2}$  | 60 / 5523            |
| 19                    | 285  | Cell cycle                                       | $1.50 \times 10^{-8}$  | 37 / 1355            |
| 20                    | 295  | Cellular component organization or biogenesis    | $4.34 \times 10^{-3}$  | 66 / 5525            |

<sup>†</sup> The number of genes in the overlap / the total number of genes in the GO category

<sup>‡</sup> Asthma gene modules enriched with genes in immune system GO categories
